# Supplementary material for: Nuclear spin relaxation in paramagnetic systems with zero-field splitting and arbitrary electron spinElectronic Supplementary Information available. See http://www.rsc.org/suppdata/cp/b1/b106659p/
Source: Royal Society of Chemistry journal article supplement (doi:10.1039/b106659p), 2001-10-29
Supplement: supp.pdf [file supp.pdf]

# Nuclear spin relaxation in paramagnetic systems with zero-field splitting and arbitrary electron spin

Danuta Kruk, Tomas Nilsson and Jozef Kowalewski

## *Supplementary material*

### S = 1

Coefficients of the relaxation matrix elements:

$$\lambda_{\alpha\beta} = \frac{1}{6} \left\{ a_{\alpha,-1}^* a_{\beta,-1} - 2a_{\alpha,0}^* a_{\beta,0} + a_{\alpha,1}^* a_{\beta,1} \right\}^2 +$$

$$\frac{1}{2} \left\{ a_{\alpha,-1}^* a_{\beta,0} - a_{\alpha,0}^* a_{\beta,1} \right\}^2 + \frac{1}{2} \left\{ a_{\alpha,0}^* a_{\beta,-1} - a_{\alpha,1}^* a_{\beta,0} \right\}^2 + \left\{ a_{\alpha,-1}^* a_{\beta,1} \right\}^2 + \left\{ a_{\alpha,1}^* a_{\beta,-1} \right\}^2$$

$$\varsigma_{\alpha\beta} = -\frac{1}{12} \left\{ a_{\alpha,-1}^* a_{\alpha,-1} - 2a_{\alpha,0}^* a_{\alpha,0} + a_{\alpha,1}^* a_{\alpha,1} - a_{\beta,-1}^* a_{\beta,-1} + 2a_{\beta,0}^* a_{\beta,0} - a_{\beta,1}^* a_{\beta,1} \right\}^2 -$$

$$\frac{1}{2} \left\{ a_{\alpha,-1}^* a_{\alpha,0} - a_{\alpha,0}^* a_{\alpha,1} - a_{\beta,-1}^* a_{\beta,0} + a_{\beta,0}^* a_{\beta,1} \right\}^2 - \left\{ a_{\alpha,-1}^* a_{\alpha,1} - a_{\beta,-1}^* a_{\beta,1} \right\}^2$$

$$\xi_{\alpha\beta} = -\frac{1}{12} \left\{ a_{\alpha,-1}^* a_{\beta,-1} - 2a_{\alpha,0}^* a_{\beta,0} + a_{\alpha,1}^* a_{\beta,1} \right\}^2 -$$

$$\frac{1}{4} \left\{ a_{\alpha,0}^* a_{\beta,-1} - a_{\alpha,1}^* a_{\beta,0} \right\}^2 - \frac{1}{4} \left\{ a_{\alpha,-1}^* a_{\beta,0} - a_{\alpha,0}^* a_{\beta,1} \right\}^2 - \frac{1}{2} \left\{ a_{\alpha,1}^* a_{\beta,-1} \right\}^2 - \frac{1}{2} \left\{ a_{\alpha,-1}^* a_{\beta,1} \right\}^2$$

Tensor operators in the  $|I, m\rangle \times |I, m'\rangle$  representation:

$$S_{-1} = |1, -1\rangle \langle 1, 0| + |1, 0\rangle \langle 1, 1|$$

$$S_0 = |1, 1\rangle \langle 1, 1| - |1, -1\rangle \langle 1, -1|$$

$$S_1 = -|1, 0\rangle \langle 1, -1| - |1, 1\rangle \langle 1, 0|$$

Coefficients of the projection vectors:

$$c_{-1}^{\alpha\beta} = a_{\alpha,1}^* a_{\beta,0} + a_{\alpha,0}^* a_{\beta,-1}$$

$$c_0^{\alpha\beta} = a_{\alpha,-1}^* a_{\beta,-1} - a_{\alpha,1}^* a_{\beta,1}$$

$$c_1^{\alpha\beta} = -a_{\alpha,0}^* a_{\beta,1} - a_{\alpha,-1}^* a_{\beta,0}$$

### S = 3/2

Coefficients of the relaxation matrix elements:

$$\begin{aligned} \lambda_{\alpha\beta} &= \frac{3}{2} \left\{ a_{\alpha,-3/2}^* a_{\beta,-3/2} - a_{\alpha,-1/2}^* a_{\beta,-1/2} - a_{\alpha,1/2}^* a_{\beta,1/2} + a_{\alpha,3/2}^* a_{\beta,3/2} \right\}^2 + \\ &\quad 3 \left\{ a_{\alpha,-3/2}^* a_{\beta,-1/2} - a_{\alpha,1/2}^* a_{\beta,3/2} \right\}^2 + 3 \left\{ a_{\alpha,-1/2}^* a_{\beta,-3/2} - a_{\alpha,3/2}^* a_{\beta,1/2} \right\}^2 + \\ &\quad 3 \left\{ a_{\alpha,-3/2}^* a_{\beta,1/2} + a_{\alpha,3/2}^* a_{\beta,-1/2} \right\}^2 + 3 \left\{ a_{\alpha,1/2}^* a_{\beta,-3/2} + a_{\alpha,-1/2}^* a_{\beta,-3/2} \right\}^2 \\ \varsigma_{\alpha\beta} &= -\frac{3}{4} \left\{ a_{\alpha,-3/2}^* a_{\alpha,-3/2} - a_{\alpha,-1/2}^* a_{\alpha,-1/2} - a_{\alpha,1/2}^* a_{\alpha,1/2} + a_{\alpha,3/2}^* a_{\alpha,3/2} - \right. \\ &\quad \left. a_{\beta,-3/2}^* a_{\beta,-3/2} + a_{\beta,-1/2}^* a_{\beta,-1/2} + a_{\beta,1/2}^* a_{\beta,1/2} - a_{\beta,3/2}^* a_{\beta,3/2} \right\}^2 - \\ &\quad 3 \left\{ a_{\alpha,-3/2}^* a_{\alpha,-1/2} - a_{\alpha,1/2}^* a_{\alpha,3/2} - a_{\beta,-3/2}^* a_{\beta,-1/2} + a_{\beta,1/2}^* a_{\beta,3/2} \right\}^2 - \\ &\quad 3 \left\{ a_{\alpha,-3/2}^* a_{\alpha,1/2} - a_{\alpha,-1/2}^* a_{\alpha,3/2} - a_{\beta,-3/2}^* a_{\beta,1/2} + a_{\beta,-1/2}^* a_{\beta,3/2} \right\}^2 \\ \xi_{\alpha\beta} &= -\frac{3}{4} \left\{ a_{\alpha,-3/2}^* a_{\beta,-3/2} - a_{\alpha,-1/2}^* a_{\beta,-1/2} - a_{\alpha,1/2}^* a_{\beta,1/2} + a_{\alpha,3/2}^* a_{\beta,3/2} \right\}^2 - \\ &\quad \frac{3}{2} \left\{ a_{\alpha,-3/2}^* a_{\beta,-1/2} - a_{\alpha,1/2}^* a_{\beta,3/2} \right\}^2 - \frac{3}{2} \left\{ a_{\alpha,-1/2}^* a_{\beta,-3/2} - a_{\alpha,3/2}^* a_{\beta,1/2} \right\}^2 - \\ &\quad \frac{3}{2} \left\{ a_{\alpha,-3/2}^* a_{\beta,1/2} + a_{\alpha,3/2}^* a_{\beta,-1/2} \right\}^2 - \frac{3}{2} \left\{ a_{\alpha,1/2}^* a_{\beta,-3/2} + a_{\alpha,-1/2}^* a_{\beta,3/2} \right\}^2 \end{aligned}$$

Tensor operators in the  $|I, m\rangle \times |I, m'\rangle$  representation:

$$S_{-1} = \sqrt{2} \left| \frac{3}{2}, -\frac{1}{2} \right\rangle \left\langle \frac{3}{2}, \frac{1}{2} \right| + \sqrt{\frac{3}{2}} \left| \frac{3}{2}, \frac{1}{2} \right\rangle \left\langle \frac{3}{2}, \frac{3}{2} \right| + \sqrt{\frac{3}{2}} \left| \frac{3}{2}, -\frac{3}{2} \right\rangle \left\langle \frac{3}{2}, -\frac{1}{2} \right|$$

$$S_0 = \frac{1}{2} \left| \frac{3}{2}, \frac{1}{2} \right\rangle \left\langle \frac{3}{2}, \frac{1}{2} \right| - \frac{1}{2} \left| \frac{3}{2}, -\frac{1}{2} \right\rangle \left\langle \frac{3}{2}, -\frac{1}{2} \right| + \frac{3}{2} \left| \frac{3}{2}, \frac{3}{2} \right\rangle \left\langle \frac{3}{2}, \frac{3}{2} \right| - \frac{3}{2} \left| \frac{3}{2}, -\frac{3}{2} \right\rangle \left\langle \frac{3}{2}, -\frac{3}{2} \right|$$

$$S_1 = \sqrt{2} \left| \frac{3}{2}, \frac{1}{2} \right\rangle \left\langle \frac{3}{2}, -\frac{1}{2} \right| + \sqrt{\frac{3}{2}} \left| \frac{3}{2}, -\frac{1}{2} \right\rangle \left\langle \frac{3}{2}, -\frac{3}{2} \right| + \sqrt{\frac{3}{2}} \left| \frac{3}{2}, \frac{3}{2} \right\rangle \left\langle \frac{3}{2}, \frac{1}{2} \right|$$

Coefficients of the projection vectors:

$$c_{-1}^{\alpha\beta} = \sqrt{2}a_{\alpha,-1/2}^*a_{\beta,1/2} + \sqrt{\frac{3}{2}}a_{\alpha,1/2}^*a_{\beta,3/2} + \sqrt{\frac{3}{2}}a_{\alpha,-3/2}^*a_{\beta,-1/2}$$

$$c_0^{\alpha\beta} = \frac{3}{2}a_{\alpha,-3/2}^*a_{\beta,-3/2} + \frac{1}{2}a_{\alpha,-1/2}^*a_{\beta,-1/2} - \frac{1}{2}a_{\alpha,1/2}^*a_{\beta,1/2} - \frac{3}{2}a_{\alpha,3/2}^*a_{\beta,3/2}$$

$$c_1^{\alpha\beta} = \sqrt{2}a_{\alpha,1/2}^*a_{\beta,-1/2} + \sqrt{\frac{3}{2}}a_{\alpha,3/2}^*a_{\beta,1/2} + \sqrt{\frac{3}{2}}a_{\alpha,-1/2}^*a_{\beta,-3/2}$$

## S = 2

Coefficients of the relaxation matrix elements:

$$\begin{aligned} \lambda_{\alpha\beta} = & \sqrt{6}a_{\alpha,-2}^*a_{\beta,-2} - \frac{3}{\sqrt{6}}a_{\alpha,-1}^*a_{\beta,-1} - \sqrt{6}a_{\alpha,0}^*a_{\beta,0} - \frac{3}{\sqrt{6}}a_{\alpha,1}^*a_{\beta,1} + \sqrt{6}a_{\alpha,2}^*a_{\beta,2}^2 + \\ & 3a_{\alpha,-2}^*a_{\beta,-1} + \frac{\sqrt{6}}{2}a_{\alpha,-1}^*a_{\beta,0} - \frac{\sqrt{6}}{2}a_{\alpha,0}^*a_{\beta,1} - 3a_{\alpha,1}^*a_{\beta,2}^2 + \\ & -3a_{\alpha,-1}^*a_{\beta,-2} - \frac{\sqrt{6}}{2}a_{\alpha,0}^*a_{\beta,-1} + \frac{\sqrt{6}}{2}a_{\alpha,1}^*a_{\beta,0} + 3a_{\alpha,2}^*a_{\beta,1}^2 + \\ & \left\{ \sqrt{6}a_{\alpha,-2}^*a_{\beta,0} - 3a_{\alpha,-1}^*a_{\beta,1} + \sqrt{6}a_{\alpha,0}^*a_{\beta,1} \right\}^2 + \left\{ \sqrt{6}a_{\alpha,0}^*a_{\beta,-2} - 3a_{\alpha,1}^*a_{\beta,-1} + \sqrt{6}a_{\alpha,2}^*a_{\beta,0} \right\}^2 \\ \varsigma_{\alpha\beta} = & -\frac{1}{2} \left\{ \sqrt{6}a_{\alpha,-2}^*a_{\alpha,-2} - \frac{3}{\sqrt{6}}a_{\alpha,-1}^*a_{\alpha,-1} - \sqrt{6}a_{\alpha,0}^*a_{\alpha,0} - \frac{3}{\sqrt{6}}a_{\alpha,1}^*a_{\alpha,1} + \sqrt{6}a_{\alpha,2}^*a_{\alpha,2} - \right. \\ & \left. \sqrt{6}a_{\beta,-2}^*a_{\beta,-2} + \frac{3}{\sqrt{6}}a_{\beta,-1}^*a_{\beta,-1} + \sqrt{6}a_{\beta,0}^*a_{\beta,0} + \frac{3}{\sqrt{6}}a_{\beta,1}^*a_{\beta,1} - \sqrt{6}a_{\beta,2}^*a_{\beta,2} \right\}^2 - \\ & 3a_{\alpha,-2}^*a_{\alpha,-1} + \frac{\sqrt{6}}{2}a_{\alpha,-1}^*a_{\alpha,0} - \frac{\sqrt{6}}{2}a_{\alpha,0}^*a_{\alpha,1} - 3a_{\alpha,1}^*a_{\alpha,2} - 3a_{\beta,-2}^*a_{\beta,-1} - \frac{\sqrt{6}}{2}a_{\beta,-1}^*a_{\beta,0} + \frac{\sqrt{6}}{2}a_{\beta,0}^*a_{\beta,1} \\ & \left\{ \sqrt{6}a_{\alpha,-2}^*a_{\alpha,0} + 3a_{\alpha,-1}^*a_{\alpha,1} + \sqrt{6}a_{\alpha,0}^*a_{\alpha,2} - \sqrt{6}a_{\beta,-2}^*a_{\beta,0} - 3a_{\beta,-1}^*a_{\beta,1} - \sqrt{6}a_{\beta,0}^*a_{\beta,2} \right\}^2 \end{aligned}$$

$$\begin{aligned}
\xi_{\alpha\beta} = & -\frac{1}{2} \sqrt{6} a_{\alpha,-2}^* a_{\beta,-2} - \frac{\sqrt{6}}{2} a_{\alpha,-1}^* a_{\beta,-1} - \sqrt{6} a_{\alpha,0}^* a_{\beta,0} - \frac{\sqrt{6}}{2} a_{\alpha,1}^* a_{\beta,1} + \sqrt{6} a_{\alpha,2}^* a_{\beta,2} \\
& - \frac{1}{2} \left( 3a_{\alpha,-2}^* a_{\beta,-1} + \frac{\sqrt{6}}{2} a_{\alpha,-1}^* a_{\beta,0} - \frac{\sqrt{6}}{2} a_{\alpha,0}^* a_{\beta,1} - 3a_{\alpha,1}^* a_{\beta,2} \right) \\
& - \frac{1}{2} \left( -3a_{\alpha,-1}^* a_{\beta,-2} - \frac{\sqrt{6}}{2} a_{\alpha,0}^* a_{\beta,-1} + \frac{\sqrt{6}}{2} a_{\alpha,1}^* a_{\beta,0} + 3a_{\alpha,2}^* a_{\beta,1} \right) \\
& - \frac{1}{2} \left\{ \sqrt{6} a_{\alpha,-2}^* a_{\beta,0} + 3a_{\alpha,-1}^* a_{\beta,1} - \sqrt{6} a_{\alpha,0}^* a_{\beta,2} \right\}^2 - \frac{1}{2} \left\{ \sqrt{6} a_{\alpha,0}^* a_{\beta,-2} + 3a_{\alpha,1}^* a_{\beta,-1} - \sqrt{6} a_{\alpha,2}^* a_{\beta,0} \right\}^2
\end{aligned}$$

Tensor operators in the  $|I, m\rangle \times |I, m'\rangle$  representation:

$$S_{-1} = \sqrt{2}|2, 1\rangle \times |2, 2\rangle + \sqrt{3}|2, 0\rangle \times |2, 1\rangle + \sqrt{3}|2, -1\rangle \times |2, 0\rangle + \sqrt{2}|2, -2\rangle \times |2, -1\rangle$$

$$S_0 = -2|2, -2\rangle \times |2, -2\rangle - |2, -1\rangle \times |2, -1\rangle + |2, 1\rangle \times |2, 1\rangle + 2|2, 2\rangle \times |2, 2\rangle$$

$$S_1 = \sqrt{2}|2, -1\rangle \times |2, -2\rangle + \sqrt{3}|2, 0\rangle \times |2, -1\rangle + \sqrt{3}|2, 1\rangle \times |2, 0\rangle + \sqrt{2}|2, 2\rangle \times |2, 1\rangle$$

Coefficients of the projection vectors:

$$c_{-1}^{\alpha\beta} = \sqrt{2} a_{\alpha,-1}^* a_{\beta,-2} + \sqrt{3} a_{\alpha,0}^* a_{\beta,-1} + \sqrt{3} a_{\alpha,1}^* a_{\beta,0} + \sqrt{2} a_{\alpha,2}^* a_{\beta,1}$$

$$c_0^{\alpha\beta} = 2a_{\alpha,-2}^* a_{\beta,-1} + a_{\alpha,-1}^* a_{\beta,-1} - a_{\alpha,1}^* a_{\beta,1} - 2a_{\alpha,2}^* a_{\beta,2}$$

$$c_1^{\alpha\beta} = \sqrt{2} a_{\alpha,-2}^* a_{\beta,-1} + \sqrt{3} a_{\alpha,-1}^* a_{\beta,0} + \sqrt{3} a_{\alpha,0}^* a_{\beta,1} + \sqrt{2} a_{\alpha,1}^* a_{\beta,2}$$

## S = 5/2

Coefficients of the relaxation matrix elements:

$$\begin{aligned} \lambda_{\alpha\beta} = & \frac{2}{3} \{5a_{\alpha,-5/2}^* a_{\beta,-5/2} - a_{\alpha,-3/2}^* a_{\beta,-3/2} - 4a_{\alpha,-1/2}^* a_{\beta,-1/2} - 4a_{\alpha,1/2}^* a_{\beta,1/2} - \\ & a_{\alpha,3/2}^* a_{\beta,3/2} + 5a_{\alpha,5/2}^* a_{\beta,5/2}\}^2 + \\ & 4\left\{\sqrt{5}a_{\alpha,-5/2}^* a_{\beta,-3/2} + \sqrt{2}a_{\alpha,-3/2}^* a_{\beta,-1/2} - \sqrt{2}a_{\alpha,1/2}^* a_{\beta,3/2} - \sqrt{5}a_{\alpha,3/2}^* a_{\beta,5/2}\right\}^2 + \\ & 4\left\{-\sqrt{5}a_{\alpha,-3/2}^* a_{\beta,-5/2} - \sqrt{2}a_{\alpha,-1/2}^* a_{\beta,-3/2} + \sqrt{2}a_{\alpha,3/2}^* a_{\beta,1/2} + \sqrt{5}a_{\alpha,5/2}^* a_{\beta,3/2}\right\}^2 + \\ & \left\{\sqrt{10}a_{\alpha,-5/2}^* a_{\beta,-1/2} + 3\sqrt{2}a_{\alpha,-3/2}^* a_{\beta,1/2} + 3\sqrt{2}a_{\alpha,-1/2}^* a_{\beta,3/2} - \sqrt{10}a_{\alpha,1/2}^* a_{\beta,5/2}\right\}^2 + \\ & \left\{\sqrt{10}a_{\alpha,-1/2}^* a_{\beta,-5/2} + 3\sqrt{2}a_{\alpha,1/2}^* a_{\beta,-3/2} + 3\sqrt{2}a_{\alpha,3/2}^* a_{\beta,-1/2} - \sqrt{10}a_{\alpha,5/2}^* a_{\beta,1/2}\right\}^2 \end{aligned}$$

$$\begin{aligned} \varsigma_{\alpha\beta} = & -\frac{1}{3} \{5a_{\alpha,-5/2}^* a_{\alpha,-5/2} - a_{\alpha,-3/2}^* a_{\alpha,-3/2} - 4a_{\alpha,-1/2}^* a_{\alpha,-1/2} - 4a_{\alpha,1/2}^* a_{\alpha,1/2} - \\ & a_{\alpha,3/2}^* a_{\alpha,3/2} + 5a_{\alpha,5/2}^* a_{\alpha,5/2} - 5a_{\beta,-5/2}^* a_{\beta,-5/2} + a_{\beta,-3/2}^* a_{\beta,-3/2} + 4a_{\beta,-1/2}^* a_{\beta,-1/2} + \\ & 4a_{\beta,1/2}^* a_{\beta,1/2} + a_{\beta,3/2}^* a_{\beta,3/2} - 5a_{\beta,5/2}^* a_{\beta,5/2}\}^2 - \\ & 4\left\{\sqrt{5}a_{\alpha,-5/2}^* a_{\alpha,-3/2} + \sqrt{2}a_{\alpha,-3/2}^* a_{\alpha,-1/2} - \sqrt{2}a_{\alpha,1/2}^* a_{\alpha,3/2} - \sqrt{5}a_{\alpha,3/2}^* a_{\alpha,5/2} - \right. \\ & \left. \sqrt{5}a_{\beta,-5/2}^* a_{\beta,-3/2} - \sqrt{2}a_{\beta,-3/2}^* a_{\beta,-1/2} + \sqrt{2}a_{\beta,1/2}^* a_{\beta,3/2} + \sqrt{5}a_{\beta,3/2}^* a_{\beta,5/2}\right\}^2 - \\ & \left\{\sqrt{10}a_{\alpha,-5/2}^* a_{\alpha,-1/2} + 3\sqrt{2}a_{\alpha,-3/2}^* a_{\alpha,1/2} + 3\sqrt{2}a_{\alpha,-1/2}^* a_{\alpha,3/2} + \sqrt{10}a_{\alpha,1/2}^* a_{\alpha,5/2} - \right. \\ & \left. \sqrt{10}a_{\beta,-5/2}^* a_{\beta,-1/2} - 3\sqrt{2}a_{\beta,-3/2}^* a_{\beta,1/2} - 3\sqrt{2}a_{\beta,-1/2}^* a_{\beta,3/2} - \sqrt{10}a_{\beta,1/2}^* a_{\beta,5/2}\right\}^2 \end{aligned}$$

$$\begin{aligned} \xi_{\alpha\beta} = & -\frac{1}{3} \{5a_{\alpha,-5/2}^* a_{\beta,-5/2} - a_{\alpha,-3/2}^* a_{\beta,-3/2} - 4a_{\alpha,-1/2}^* a_{\beta,-1/2} - 4a_{\alpha,1/2}^* a_{\beta,1/2} - \\ & a_{\alpha,3/2}^* a_{\beta,3/2} + 5a_{\alpha,5/2}^* a_{\beta,5/2}\}^2 - \\ & 2\left\{\sqrt{5}a_{\alpha,-5/2}^* a_{\beta,-3/2} + \sqrt{2}a_{\alpha,-3/2}^* a_{\beta,-1/2} - \sqrt{2}a_{\alpha,1/2}^* a_{\beta,3/2} - \sqrt{5}a_{\alpha,3/2}^* a_{\beta,5/2}\right\}^2 + \\ & 2\left\{-\sqrt{5}a_{\alpha,-3/2}^* a_{\beta,-5/2} - \sqrt{2}a_{\alpha,-1/2}^* a_{\beta,-3/2} + \sqrt{2}a_{\alpha,3/2}^* a_{\beta,1/2} + \sqrt{5}a_{\alpha,5/2}^* a_{\beta,3/2}\right\}^2 + \\ & \frac{1}{2} \left\{\sqrt{10}a_{\alpha,-5/2}^* a_{\beta,-1/2} + 3\sqrt{2}a_{\alpha,-3/2}^* a_{\beta,1/2} + 3\sqrt{2}a_{\alpha,-1/2}^* a_{\beta,3/2} + \sqrt{10}a_{\alpha,1/2}^* a_{\beta,5/2}\right\}^2 + \\ & \frac{1}{2} \left\{\sqrt{10}a_{\alpha,-1/2}^* a_{\beta,-5/2} + 3\sqrt{2}a_{\alpha,1/2}^* a_{\beta,-3/2} + 3\sqrt{2}a_{\alpha,3/2}^* a_{\beta,-1/2} + \sqrt{10}a_{\alpha,5/2}^* a_{\beta,1/2}\right\}^2 \end{aligned}$$

Tensor operators in the  $|I, m\rangle \times |I, m'\rangle$  representation:

$$\begin{aligned}
S_{-1} &= \frac{3}{\sqrt{2}} \left| \frac{5}{2}, -\frac{1}{2} \right\rangle \left\langle \frac{5}{2}, \frac{1}{2} \right| + 2 \left| \frac{5}{2}, \frac{1}{2} \right\rangle \left\langle \frac{5}{2}, \frac{3}{2} \right| + 2 \left| \frac{5}{2}, -\frac{3}{2} \right\rangle \left\langle \frac{5}{2}, -\frac{1}{2} \right| + \\
&\quad \sqrt{\frac{5}{2}} \left| \frac{5}{2}, -\frac{3}{2} \right\rangle \left\langle \frac{5}{2}, -\frac{5}{2} \right| + \sqrt{\frac{5}{2}} \left| \frac{5}{2}, \frac{5}{2} \right\rangle \left\langle \frac{5}{2}, \frac{3}{2} \right| \\
S_0 &= \frac{1}{2} \left| \frac{5}{2}, \frac{1}{2} \right\rangle \left\langle \frac{5}{2}, \frac{1}{2} \right| - \frac{1}{2} \left| \frac{5}{2}, -\frac{1}{2} \right\rangle \left\langle \frac{5}{2}, -\frac{1}{2} \right| + \frac{3}{2} \left| \frac{5}{2}, \frac{3}{2} \right\rangle \left\langle \frac{5}{2}, \frac{3}{2} \right| - \frac{3}{2} \left| \frac{5}{2}, -\frac{3}{2} \right\rangle \left\langle \frac{5}{2}, -\frac{3}{2} \right| + \\
&\quad \frac{5}{2} \left| \frac{5}{2}, \frac{5}{2} \right\rangle \left\langle \frac{5}{2}, \frac{5}{2} \right| - \frac{5}{2} \left| \frac{5}{2}, -\frac{5}{2} \right\rangle \left\langle \frac{5}{2}, -\frac{5}{2} \right| \\
S_1 &= \frac{3}{\sqrt{2}} \left| \frac{5}{2}, \frac{1}{2} \right\rangle \left\langle \frac{5}{2}, -\frac{1}{2} \right| + 2 \left| \frac{5}{2}, \frac{3}{2} \right\rangle \left\langle \frac{5}{2}, \frac{1}{2} \right| + 2 \left| \frac{5}{2}, -\frac{1}{2} \right\rangle \left\langle \frac{5}{2}, -\frac{3}{2} \right| + \\
&\quad \sqrt{\frac{5}{2}} \left| \frac{5}{2}, -\frac{5}{2} \right\rangle \left\langle \frac{5}{2}, -\frac{3}{2} \right| + \sqrt{\frac{5}{2}} \left| \frac{5}{2}, \frac{3}{2} \right\rangle \left\langle \frac{5}{2}, \frac{5}{2} \right|
\end{aligned}$$

Coefficients of the projection vectors:

$$\begin{aligned}
c_{-1}^{\alpha\beta} &= \sqrt{\frac{5}{2}} a_{\alpha, -5/2}^* a_{\beta, -3/2} + 2 a_{\alpha, -3/2}^* a_{\beta, -1/2} + \frac{3}{\sqrt{2}} a_{\alpha, -1/2}^* a_{\beta, 1/2} + 2 a_{\alpha, 1/2}^* a_{\beta, 3/2} + \\
&\quad \sqrt{\frac{5}{2}} a_{\alpha, 3/2}^* a_{\beta, 5/2} \\
c_0^{\alpha\beta} &= \frac{5}{2} a_{\alpha, -5/2}^* a_{\beta, -5/2} + \frac{3}{2} a_{\alpha, -3/2}^* a_{\beta, -3/2} + \frac{1}{2} a_{\alpha, -1/2}^* a_{\beta, -1/2} - \frac{1}{2} a_{\alpha, 1/2}^* a_{\beta, 1/2} - \\
&\quad \frac{3}{2} a_{\alpha, 3/2}^* a_{\beta, 3/2} - \frac{5}{2} a_{\alpha, 5/2}^* a_{\beta, 5/2} \\
c_1^{\alpha\beta} &= \sqrt{\frac{5}{2}} a_{\alpha, -3/2}^* a_{\beta, -5/2} + 2 a_{\alpha, -1/2}^* a_{\beta, -3/2} + \frac{3}{\sqrt{2}} a_{\alpha, 1/2}^* a_{\beta, -1/2} + 2 a_{\alpha, 3/2}^* a_{\beta, 1/2} + \\
&\quad \sqrt{\frac{5}{2}} a_{\alpha, 5/2}^* a_{\beta, 3/2}
\end{aligned}$$

### S = 3

Coefficients of the relaxation matrix elements:

$$\begin{aligned}
\lambda_{\alpha\beta} = & \frac{3}{2} \left\{ 5a_{\alpha,-3}^* a_{\beta,-3} - 3a_{\alpha,-1}^* a_{\beta,-1} - 4a_{\alpha,0}^* a_{\beta,0} - 3a_{\alpha,1}^* a_{\beta,1} + 5a_{\alpha,3}^* a_{\beta,3} \right\}^2 + \\
& \frac{1}{4} \left\{ 5\sqrt{6}a_{\alpha,-3}^* a_{\beta,-2} + 3\sqrt{10}a_{\alpha,-2}^* a_{\beta,-1} - 2\sqrt{3}a_{\alpha,-1}^* a_{\beta,0} - 2\sqrt{3}a_{\alpha,0}^* a_{\beta,1} - 3\sqrt{10}a_{\alpha,1}^* a_{\beta,2} - \right. \\
& \left. 5\sqrt{6}a_{\alpha,2}^* a_{\beta,3} \right\}^2 + \frac{1}{4} \left\{ -5\sqrt{6}a_{\alpha,-2}^* a_{\beta,-3} - 3\sqrt{10}a_{\alpha,-1}^* a_{\beta,-2} + 2\sqrt{3}a_{\alpha,0}^* a_{\beta,-1} + 2\sqrt{3}a_{\alpha,1}^* a_{\beta,0} + \right. \\
& \left. 3\sqrt{10}a_{\alpha,2}^* a_{\beta,1} + 5\sqrt{6}a_{\alpha,3}^* a_{\beta,2} \right\}^2 + \\
& \left\{ \sqrt{15}a_{\alpha,-3}^* a_{\beta,-1} + \sqrt{30}a_{\alpha,-2}^* a_{\beta,0} + 6a_{\alpha,-1}^* a_{\beta,1} + \sqrt{30}a_{\alpha,0}^* a_{\beta,2} + \sqrt{15}a_{\alpha,1}^* a_{\beta,3} \right\}^2 + \\
& \left\{ \sqrt{15}a_{\alpha,-1}^* a_{\beta,-3} + \sqrt{30}a_{\alpha,0}^* a_{\beta,-2} + 6a_{\alpha,1}^* a_{\beta,-1} + \sqrt{30}a_{\alpha,2}^* a_{\beta,0} + \sqrt{15}a_{\alpha,3}^* a_{\beta,1} \right\}^2 \\
\zeta_{\alpha\beta} = & -\frac{3}{4} \left\{ 5a_{\alpha,-3}^* a_{\alpha,-3} - 3a_{\alpha,-1}^* a_{\alpha,-1} - 4a_{\alpha,0}^* a_{\alpha,0} - 3a_{\alpha,1}^* a_{\alpha,1} + 5a_{\alpha,3}^* a_{\alpha,3} - \right. \\
& \left. 5a_{\beta,-3}^* a_{\beta,-3} + 3a_{\beta,-1}^* a_{\beta,-1} + 4a_{\beta,0}^* a_{\beta,0} + 3a_{\beta,1}^* a_{\beta,1} - 5a_{\beta,3}^* a_{\beta,3} \right\}^2 - \\
& \frac{1}{4} \left\{ 5\sqrt{6}a_{\alpha,-3}^* a_{\alpha,-2} + 3\sqrt{10}a_{\alpha,-2}^* a_{\alpha,-1} + 2\sqrt{3}a_{\alpha,-1}^* a_{\alpha,0} - 2\sqrt{3}a_{\alpha,0}^* a_{\alpha,1} - \right. \\
& \left. 3\sqrt{10}a_{\alpha,1}^* a_{\alpha,2} - 5\sqrt{6}a_{\alpha,2}^* a_{\alpha,3} - 5\sqrt{6}a_{\beta,-3}^* a_{\beta,-2} - 3\sqrt{10}a_{\beta,-2}^* a_{\beta,-1} - 2\sqrt{3}a_{\beta,-1}^* a_{\beta,0} + \right. \\
& \left. 2\sqrt{3}a_{\beta,0}^* a_{\beta,1} + 3\sqrt{10}a_{\beta,1}^* a_{\beta,2} + 5\sqrt{6}a_{\beta,2}^* a_{\beta,3} \right\}^2 - \\
& \left\{ \sqrt{15}a_{\alpha,-3}^* a_{\alpha,-1} + \sqrt{30}a_{\alpha,-2}^* a_{\alpha,0} + 6a_{\alpha,-1}^* a_{\alpha,1} + \sqrt{30}a_{\alpha,0}^* a_{\alpha,2} + \sqrt{15}a_{\alpha,1}^* a_{\alpha,3} - \right. \\
& \left. \sqrt{15}a_{\beta,-3}^* a_{\beta,-1} - \sqrt{30}a_{\beta,-2}^* a_{\beta,0} - 6a_{\beta,-1}^* a_{\beta,1} - \sqrt{30}a_{\beta,0}^* a_{\beta,2} - \sqrt{15}a_{\beta,1}^* a_{\beta,3} \right\}^2 \\
\xi_{\alpha\beta} = & -\frac{3}{4} \left\{ 5a_{\alpha,-3}^* a_{\beta,-3} - 3a_{\alpha,-1}^* a_{\beta,-1} - 4a_{\alpha,0}^* a_{\beta,0} - 3a_{\alpha,1}^* a_{\beta,1} + 5a_{\alpha,3}^* a_{\beta,3} \right\}^2 - \\
& \frac{1}{8} \left\{ 5\sqrt{6}a_{\alpha,-3}^* a_{\beta,-2} + 3\sqrt{10}a_{\alpha,-2}^* a_{\beta,-1} - 2\sqrt{3}a_{\alpha,-1}^* a_{\beta,0} - 2\sqrt{3}a_{\alpha,0}^* a_{\beta,1} - \right. \\
& \left. 3\sqrt{10}a_{\alpha,1}^* a_{\beta,2} - 5\sqrt{6}a_{\alpha,2}^* a_{\beta,3} \right\}^2 - \frac{1}{8} \left\{ -5\sqrt{6}a_{\alpha,-2}^* a_{\beta,-3} - 3\sqrt{10}a_{\alpha,-1}^* a_{\beta,-2} + 2\sqrt{3}a_{\alpha,0}^* a_{\beta,-1} + \right. \\
& \left. 2\sqrt{3}a_{\alpha,1}^* a_{\beta,0} + 3\sqrt{10}a_{\alpha,2}^* a_{\beta,1} + 5\sqrt{6}a_{\alpha,3}^* a_{\beta,2} \right\}^2 - \\
& \frac{1}{2} \left\{ \sqrt{15}a_{\alpha,-3}^* a_{\beta,-1} + \sqrt{30}a_{\alpha,-2}^* a_{\beta,0} + 6a_{\alpha,-1}^* a_{\beta,1} + \sqrt{30}a_{\alpha,0}^* a_{\beta,2} + \sqrt{15}a_{\alpha,1}^* a_{\beta,3} \right\}^2 - \\
& \frac{1}{2} \left\{ \sqrt{15}a_{\alpha,-1}^* a_{\beta,-3} + \sqrt{30}a_{\alpha,0}^* a_{\beta,-2} + 6a_{\alpha,1}^* a_{\beta,-1} + \sqrt{30}a_{\alpha,2}^* a_{\beta,0} + \sqrt{15}a_{\alpha,3}^* a_{\beta,1} \right\}^2
\end{aligned}$$

Tensor operators in the  $|I, m\rangle \times |I, m'\rangle$  representation:

$$\begin{aligned}
 S_{-1} &= \sqrt{3}|3, -3\rangle\langle 3, -2| + \sqrt{5}|3, -2\rangle\langle 3, -1| + \sqrt{6}|3, -1\rangle\langle 3, 0| + \\
 &\quad \sqrt{6}|3, 0\rangle\langle 3, 1| + \sqrt{5}|3, 1\rangle\langle 3, 2| + \sqrt{3}|3, 2\rangle\langle 3, 3| \\
 S_0 &= -3|3, -3\rangle\langle 3, -3| - 2|3, -2\rangle\langle 3, -2| - |3, -1\rangle\langle 3, -1| + \\
 &\quad |3, 1\rangle\langle 3, 1| + 2|3, 2\rangle\langle 3, 2| + 3|3, 3\rangle\langle 3, 3| \\
 S_1 &= \sqrt{3}|3, -2\rangle\langle 3, -3| + \sqrt{5}|3, -1\rangle\langle 3, -2| + \sqrt{6}|3, 0\rangle\langle 3, -1| + \\
 &\quad \sqrt{6}|3, 1\rangle\langle 3, 0| + \sqrt{5}|3, 2\rangle\langle 3, 1| + \sqrt{3}|3, 3\rangle\langle 3, 2|
 \end{aligned}$$

Coefficients of the projection vectors:

$$\begin{aligned}
 c_{-1}^{\alpha\beta} &= \sqrt{3}a_{\alpha, -2}^* a_{\beta, -3} + \sqrt{5}a_{\alpha, -1}^* a_{\beta, -2} + \sqrt{6}a_{\alpha, 0}^* a_{\beta, -1} + \sqrt{6}a_{\alpha, 1}^* a_{\beta, 0} + \\
 &\quad \sqrt{5}a_{\alpha, 2}^* a_{\beta, 1} + \sqrt{3}a_{\alpha, 3}^* a_{\beta, 2} \\
 c_0^{\alpha\beta} &= 3a_{\alpha, -3}^* a_{\beta, -3} + 2a_{\alpha, -2}^* a_{\beta, -2} + a_{\alpha, -1}^* a_{\beta, -1} - a_{\alpha, 1}^* a_{\beta, 1} - 2a_{\alpha, 2}^* a_{\beta, 2} - 3a_{\alpha, 3}^* a_{\beta, 3} \\
 c_1^{\alpha\beta} &= \sqrt{3}a_{\alpha, -3}^* a_{\beta, -2} + \sqrt{5}a_{\alpha, -2}^* a_{\beta, -1} + \sqrt{6}a_{\alpha, -1}^* a_{\beta, 0} + \sqrt{6}a_{\alpha, 0}^* a_{\beta, 1} + \\
 &\quad \sqrt{5}a_{\alpha, 1}^* a_{\beta, 2} + \sqrt{3}a_{\alpha, 2}^* a_{\beta, 3}
 \end{aligned}$$
